# Supplementary material
Source: Research Square preprint supplement (doi:10.21203/rs.3.rs-8768667/v1)
Supplement: Supplementary file 1 [file 454859f874c4871376fa9b6b.pdf]

## **Supplementary Material 1**

### **Document Classification and Analytic Mapping Framework**

#### **1. Document Categories Used in the Analysis**

The study relied exclusively on organisational and system-level artefacts. Documents were grouped into structured analytic categories to enable cross-level comparison of implementation dynamics. Categories are outlined below:

##### **A. Policy and Payer-Level Documents**

- Medicaid contractual provisions
- State-level regulatory guidance
- Standardised reporting requirements
- Quality metric specifications
- Compliance audit criteria
- Reimbursement-linked screening mandates

**Purpose:** To identify externally imposed expectations defining EBP compliance and performance indicators (Williams et al., 2020; Durojaiye et al., 2024).

##### **B. Organisational Governance Materials**

- Internal clinic protocols
- Implementation manuals
- Leadership communications
- Training materials
- Task allocation frameworks
- Accountability structures

**Purpose:** To examine translation of policy mandates into formalised organisational procedures (Kilbourne et al., 2012; Jaramillo et al., 2023).

### **C. Workflow and Operational Artefacts**

- Clinical workflow diagrams
- Process maps
- Task sequencing charts
- Appointment flow structures
- Screening integration schematics

**Purpose:** To analyse intended versus enacted workflow sequencing and operational feasibility (Zheng et al., 2020; Carayon et al., 2015).

### **D. Electronic Health Record (EHR) Configuration Materials**

- Alert logic specifications
- Mandatory field structures
- Screening templates
- Data capture protocols
- Reporting interface configurations

**Purpose:** To assess sociotechnical structuring of screening activities and digital workflow friction (Pinevich et al., 2021; Olakotan et al., 2025).

### **E. Audit and Performance Monitoring Reports**

- Benchmark dashboards
- Compliance summaries
- Quality performance reports
- Documentation completeness analyses
- Feedback loop documentation

**Purpose:** To evaluate how implementation success was operationalised and monitored (Lennox et al., 2018; Wooldridge et al., 2017).

## **2. Coding Logic Structure**

The analytic process followed an iterative, conceptually guided thematic mapping approach informed by implementation science (Moore et al., 2015; Damschroder et al., 2022).

### **Step 1: Structural Classification**

Documents were first categorised by governance level:

- Policy (external)
- Organisational (meso-level)
- Workflow (operational)
- Technological (EHR infrastructure)

This allowed tracing of mandate translation across system layers.

### **Step 2: Sensitising Concept Application**

Rather than applying a rigid determinant framework, sensitising concepts drawn from implementation science guided interpretive coding (Nilsen, 2015; Chambers et al., 2013).

Primary analytic constructs:

- Workflow compatibility
- Organisational readiness
- Climate for implementation
- Sociotechnical interaction
- Documentation burden
- Alert density and task sequencing
- Fidelity versus procedural adaptation
- Feedback loop integration

These concepts were used heuristically rather than deductively to avoid construct imposition bias (Kirk et al., 2016).

### **Step 3: Divergence Mapping**

A key analytic strategy involved identifying divergence between:

- Work-as-imagined (formal protocols)
- Work-as-configured (EHR logic and dashboards)
- Work-as-anticipated (training materials)

Divergence signals were treated as indicators of structural friction (McCurdie et al., 2017; Zheng et al., 2020).

### **Step 4: Adaptation Typology Development**

Observed responses to structural friction were categorised into:

#### **Structural Adaptations**

- Role reallocation
- Workflow revision
- Template modification
- Formal timing adjustments

#### **Behavioural Adaptations**

- Delayed documentation
- Selective alert engagement
- Task bundling
- Informal redistribution

This typology was informed by dynamic sustainability and fidelity–adaptation scholarship (Chambers et al., 2013; von Thiele Schwarz et al., 2019; Owczarzak et al., 2016).

### Step 5: Cross-Level Synthesis

Patterns were synthesised to trace causal chains:

Policy Mandate → Organisational Translation → Digital Configuration → Workflow Density → Adaptive Response → Audit Feedback → Iterative Adjustment

This synthesis reflects relational implementation modelling rather than linear stage progression (Lewis et al., 2018; Powell et al., 2019).

### 3. Mapping of Artefacts to Framework Components

The table below illustrates how artefacts informed each conceptual domain of the framework.

| <b>Framework Component</b>          | <b>Supporting Artefact Categories</b>               | <b>Analytical Focus</b>                                             | <b>Key Literature Anchor</b>                   |
|-------------------------------------|-----------------------------------------------------|---------------------------------------------------------------------|------------------------------------------------|
| <b>External Mandate Structuring</b> | Medicaid contracts, reporting guidelines            | Definition of implementation success (documentation vs feasibility) | Williams et al., 2020; Durojaiye et al., 2024  |
| <b>Organisational Translation</b>   | Protocols, training manuals, task allocation charts | Responsibility clarity, readiness, governance hierarchy             | Jaramillo et al., 2023; Kilbourne et al., 2012 |
| <b>Sociotechnical Configuration</b> | EHR logic specs, alert templates                    | Task density, alert rigidity, sequencing conflicts                  | Pinevich et al., 2021; Olakotan et al., 2025   |

|                                  |                                               |                                                |                                                        |
|----------------------------------|-----------------------------------------------|------------------------------------------------|--------------------------------------------------------|
| <b>Workflow Integration</b>      | Process maps, appointment structures          | Additive layering vs redesign                  | Zheng et al., 2020; Carayon et al., 2015               |
| <b>Audit Feedback Mechanisms</b> | Dashboards, compliance summaries              | Metric prioritisation, performance orientation | Lennox et al., 2018                                    |
| <b>Adaptive Responses</b>        | Workflow revisions, documentation adjustments | Structural vs behavioural adaptation           | Chambers et al., 2013; von Thiele Schwarz et al., 2019 |

**4. Methodological Transparency Statement**

The analytic mapping framework was constructed to ensure:

- Structural triangulation across governance levels (Moore et al., 2015)
- Theoretical coherence with implementation science (Damschroder et al., 2022)
- Avoidance of overextension beyond documentary evidence
- Explicit traceability between artefacts and interpretive claims

No raw documents are included due to institutional confidentiality constraints.
